# Supplementary material for: Vaccine Effectiveness against GP-Attended Symptomatic COVID-19 and Hybrid Immunity among Adults in Hungary during the 2022–2023 Respiratory Season Dominated by Different SARS-CoV-2 Omicron Subvariants
Source: MDPI journal article supplement (doi:10.3390/vaccines12050496), 2024-05-04
Supplement: s1 [file s1]

# Supplement

**Supplement Table S1.** Baseline characteristics of SARS-CoV-2 cases and test-negative controls included in at least one booster CVE analysis, VEBIS primary care study, Hungary, September 2022 -March 2023.

| Characteristics                 | 18+ included in at least first booster analyses<br>(Full primary series + at least 1 booster VS. Unvaccinated) |            |                                       |            |         |       |
|---------------------------------|----------------------------------------------------------------------------------------------------------------|------------|---------------------------------------|------------|---------|-------|
|                                 | SARS-CoV-2 cases<br>(n = 247)                                                                                  |            | Test-negative controls<br>(n = 1,073) |            | p-value |       |
|                                 | n                                                                                                              | %          | n                                     | %          |         |       |
|                                 |                                                                                                                |            |                                       |            |         |       |
| Age (median [IQR])              |                                                                                                                | 53 [41–68] |                                       | 51 [37–66] |         | 0.015 |
|                                 | Missing                                                                                                        | 0          | 0.00                                  | 0          | 0.00    |       |
| Age group (years)               |                                                                                                                |            |                                       |            |         |       |
|                                 | 18-59                                                                                                          | 137        | 55.47                                 | 693        | 64.59   |       |
|                                 | 60+                                                                                                            | 110        | 44.53                                 | 380        | 35.41   | 0.007 |
| Sex                             |                                                                                                                |            |                                       |            |         |       |
|                                 | Female                                                                                                         | 146        | 59.11                                 | 650        | 60.58   |       |
|                                 | Male                                                                                                           | 101        | 40.89                                 | 423        | 39.42   | 0.671 |
|                                 | Missing                                                                                                        | 0          | 0.00                                  | 0          | 0.00    |       |
| BMI <sup>a</sup>                |                                                                                                                |            |                                       |            |         |       |
|                                 | max. 29                                                                                                        | 172        | 69.64                                 | 736        | 68.59   |       |
|                                 | 30+                                                                                                            | 75         | 30.36                                 | 337        | 31.41   | 0.750 |
|                                 | Missing                                                                                                        | 0          | 0.00                                  | 0          | 0.00    |       |
| Symptoms                        |                                                                                                                |            |                                       |            |         |       |
|                                 | Cough                                                                                                          | 210        | 85.02                                 | 864        | 80.52   | 0.102 |
|                                 | Short breath                                                                                                   | 31         | 12.55                                 | 148        | 13.81   | 0.604 |
|                                 | Sore throat                                                                                                    | 212        | 85.83                                 | 845        | 78.75   | 0.012 |
|                                 | Coryza                                                                                                         | 209        | 84.62                                 | 930        | 86.67   | 0.397 |
|                                 | Fever                                                                                                          | 167        | 67.61                                 | 603        | 56.20   | 0.001 |
|                                 | Malaise                                                                                                        | 222        | 89.88                                 | 860        | 80.15   | 0.000 |
|                                 | Myalgia                                                                                                        | 166        | 67.21                                 | 534        | 49.77   | 0.000 |
|                                 | Headache                                                                                                       | 171        | 69.23                                 | 600        | 55.97   | 0.000 |
|                                 | Anosmia                                                                                                        | 17         | 6.88                                  | 28         | 2.61    | 0.001 |
|                                 | Ageusia                                                                                                        | 14         | 5.67                                  | 24         | 2.24    | 0.004 |
| Chronic condition <sup>ba</sup> |                                                                                                                |            |                                       |            |         |       |
|                                 | Presence of chronic condition                                                                                  | 69         | 27.94                                 | 278        | 25.91   | 0.480 |
|                                 | No chronic condition                                                                                           | 174        | 70.45                                 | 784        | 73.07   |       |
|                                 | Missing                                                                                                        | 4          | 1.62                                  | 11         | 1.03    |       |
| Chronic condition <sup>bb</sup> |                                                                                                                |            |                                       |            |         |       |
|                                 | Presence of chronic condition                                                                                  | 113        | 45.75                                 | 497        | 46.32   | 0.842 |

|                                                       |  |     |       |     |       |       |
|-------------------------------------------------------|--|-----|-------|-----|-------|-------|
|                                                       |  |     |       |     |       |       |
| No chronic condition                                  |  | 134 | 54.25 | 573 | 53.40 |       |
| Missing                                               |  | 0   | 0.00  | 3   | 0.28  |       |
| Severity <sup>c</sup>                                 |  |     |       |     |       |       |
| 0                                                     |  | 231 | 93.52 | 979 | 91.24 |       |
| 1+                                                    |  | 16  | 6.48  | 94  | 8.76  | 0.242 |
| Missing                                               |  | 0   | 0.00  | 0   | 0.00  |       |
| GP consultation <sup>d</sup>                          |  |     |       |     |       |       |
| 0-1                                                   |  | 27  | 10.93 | 145 | 13.51 |       |
| 2+                                                    |  | 220 | 89.07 | 928 | 86.49 | 0.277 |
| Missing                                               |  | 0   | 0.00  | 0   | 0.00  |       |
| 0-4                                                   |  | 102 | 41.30 | 505 | 47.06 |       |
| 5+                                                    |  | 145 | 58.70 | 568 | 52.94 | 0.101 |
| Missing                                               |  | 0   | 0.00  | 0   | 0.00  |       |
| Smoking <sup>e</sup>                                  |  |     |       |     |       |       |
| Never or former                                       |  | 191 | 77.33 | 798 | 74.37 |       |
| Current                                               |  | 32  | 12.96 | 225 | 20.97 | 0.011 |
| Missing                                               |  | 24  | 9.72  | 50  | 4.66  |       |
| Swab delay <sup>f</sup>                               |  |     |       |     |       |       |
| max. 2 days                                           |  | 119 | 48.18 | 630 | 58.71 |       |
| 3+ days                                               |  | 128 | 51.82 | 443 | 41.29 | 0.003 |
| Missing                                               |  | 0   | 0.00  | 0   | 0.00  |       |
| Previous SARS-CoV-2 test <sup>g</sup>                 |  |     |       |     |       |       |
| Previous test                                         |  | 98  | 39.68 | 215 | 20.04 | 0.000 |
| No previous test                                      |  | 149 | 60.32 | 858 | 79.96 |       |
| Missing                                               |  | 0   | 0.00  | 0   | 0.00  |       |
| Self-reported prior SARS-CoV-2 infection <sup>h</sup> |  |     |       |     |       |       |
| Prior                                                 |  | 45  | 18.22 | 225 | 20.97 | 0.334 |
| No prior                                              |  | 202 | 81.78 | 848 | 79.03 |       |
| Missing                                               |  | 0   | 0.00  | 0   | 0.00  |       |
| Self-reported prior SARS-CoV-2 infection <sup>h</sup> |  |     |       |     |       |       |
| Prior (60-365 days)                                   |  | 13  | 6.05  | 109 | 11.39 | 0.020 |
| No prior                                              |  | 202 | 93.95 | 848 | 88.61 |       |
| Self-reported prior SARS-CoV-2 infection <sup>h</sup> |  |     |       |     |       |       |
| Prior (366+ days)                                     |  | 32  | 13.68 | 116 | 12.03 | 0.494 |
| No prior                                              |  | 202 | 86.32 | 848 | 87.97 |       |
| COVID-19 vaccination status                           |  |     |       |     |       |       |
| Unvaccinated                                          |  |     |       |     |       |       |
| All                                                   |  | 57  | 23.08 | 234 | 21.81 |       |
| 18-59 years (age)                                     |  | 40  | 29.20 | 205 | 29.58 |       |
| 60+ years (age)                                       |  | 17  | 15.45 | 29  | 7.63  |       |

**Full primary series plus at least one booster dose**

|                                                   |     |       |     |       |       |
|---------------------------------------------------|-----|-------|-----|-------|-------|
| <b>All</b>                                        | 190 | 76.92 | 839 | 78.19 | 0.664 |
| <b>18-59 years (age)</b>                          | 97  | 70.80 | 488 | 70.42 | 0.928 |
| <b>60+ years (age)</b>                            | 93  | 84.55 | 351 | 92.37 | 0.013 |
| <b>14-180 days (time since last vaccination)</b>  | 7   | 2.83  | 45  | 4.19  | 0.296 |
| <b>181-365 days (time since last vaccination)</b> | 66  | 26.72 | 252 | 23.49 | 0.720 |
| <b>366+ days (time since last vaccination)</b>    | 117 | 47.37 | 542 | 50.51 | 0.501 |
| <b>Homologous series <sup>i</sup></b>             | 76  | 30.77 | 420 | 39.14 | 0.123 |
| <b>Heterologous series <sup>i</sup></b>           | 114 | 46.15 | 419 | 39.05 | 0.542 |

<sup>a</sup> BMI calculated as weight/(height\*height).

<sup>ba</sup> The presence of chronic condition is defined as reporting at least one of the following conditions: diabetes, heart disease, lung disease, immunodeficiency.

<sup>bb</sup> The presence of chronic condition is defined as reporting at least one of the following conditions: diabetes, heart disease, hypertension, lung disease, immunodeficiency, cancer, renal disease.

<sup>c</sup> Severity: number of hospitalizations in the previous 12 months for chronic disease.

<sup>d</sup> Number of GP consultations in the previous 12 months.

<sup>e</sup> Former: stopped smoking at least 1 year before inclusion in the study. Current smoker: any smoking can be included: cigarettes, cigars, vaping, etc.

<sup>f</sup> Swab delay: number of days between date of swab and date of onset.

<sup>g</sup> Previous SARS-CoV-2 test: Has the patient had a previous SARS-CoV-2 test (e.g. PCR, antigen, both, unknown) related to his/her current symptoms?

<sup>h</sup> Previous SARS-CoV-2 infection: Has the patient had a positive SARS-CoV-2 test prior to this illness episode? (At all, 60-365, 366+ days before current onset)

<sup>i</sup> Homologous series: primary series and at least one dose booster dose are all mRNA vaccines. Heterologous series: primary series and at least one dose booster are not all mRNA vaccines.

**Supplement Table S2.** COVID-19 vaccine effectiveness estimates for at least first booster vaccination among 18+ adults, VEBIS primary care study, Hungary, September 2022 -March 2023.

| Population                                                                         | Time since last booster vaccination (days) | Adjusted CVE (95% CI)* | N     | Vaccinated cases | Unvaccinated cases | Vaccinated controls | Unvaccinated controls |
|------------------------------------------------------------------------------------|--------------------------------------------|------------------------|-------|------------------|--------------------|---------------------|-----------------------|
| Adults aged 18 years and above                                                     | 14+                                        | 20.4 (-13.9; 44.4)     | 1,320 | 190              | 57                 | 839                 | 234                   |
| Adults aged 18 years and above (plus adjustment for previous SARS-CoV-2 infection) | 14+                                        | 20.4 (-14.0; 44.4)     | 1,320 | 190              | 57                 | 839                 | 234                   |
| Adults aged 18 years and above (plus adjustment for previous SARS-CoV-2 test)      | 14+                                        | 20.3 (-14.9; 44.7)     | 1,320 | 190              | 57                 | 839                 | 234                   |
| Adults aged 18 years and above reporting no previous SARS-CoV-2 test               | 14+                                        | 29.5 (-9.4; 54.6)      | 1,007 | 112              | 37                 | 671                 | 187                   |
| Adults aged 18 years and above reporting previous SARS-CoV-2 test                  | 14+                                        | 10.5 (-114.6; 43.1)    | 313   | 78               | 20                 | 168                 | 47                    |
| Adults aged 18-59 years                                                            | 14+                                        | 2.3 (-50.0; 36.3)      | 830   | 97               | 40                 | 488                 | 205                   |
| Adults aged 18-59 years (plus adjustment for previous SARS-CoV-2 infection)        | 14+                                        | 1.4 (-51.5; 35.8)      | 830   | 97               | 40                 | 488                 | 205                   |
| Adults aged 18-59 years and above (plus adjustment for previous SARS-CoV-2 test)   | 14+                                        | 0.7 (-53.8; 35.9)      | 830   | 97               | 40                 | 488                 | 205                   |
| Adults aged 60 years and above                                                     | 14+                                        | 56.8 (11.9; 78.8)      | 490   | 93               | 17                 | 351                 | 29                    |
| Adults aged 60 years and above (plus adjustment for previous SARS-CoV-2 infection) | 14+                                        | 57.7 (13.3; 79.4)      | 490   | 93               | 17                 | 351                 | 29                    |
| Adults aged 60 years and above (plus adjustment for previous SARS-CoV-2 test)      | 14+                                        | 58.3 (14.2; 79.7)      | 490   | 93               | 17                 | 351                 | 29                    |

|                                                                                    |         |                            |     |     |    |     |     |
|------------------------------------------------------------------------------------|---------|----------------------------|-----|-----|----|-----|-----|
| Adults aged 18 years and above                                                     | 14-180  | 63.8 (-14.0;<br>88.5)      | 343 | 7   | 57 | 45  | 234 |
| Adults aged 18 years and above                                                     | 181-365 | 57.4 (30.5;<br>73.9)       | 609 | 66  | 57 | 252 | 234 |
| Adults aged 18 years and above                                                     | 14-365  | 55.4 (28.9;<br>72.1)       | 661 | 73  | 57 | 297 | 234 |
| Adults aged 18 years and above (plus adjustment for previous SARS-CoV-2 infection) | 14-365  | 54.6 (27.4;<br>71.6)       | 661 | 73  | 57 | 297 | 234 |
| Adults aged 18 years and above (plus adjustment for previous SARS-CoV-2 test)      | 14-365  | 55.9 (29.0;<br>72.6)       | 661 | 73  | 57 | 297 | 234 |
| Adults aged 18 years and above reporting no previous SARS-CoV-2 test               | 14-365  | 57.6 (24.2;<br>76.3)       | 488 | 38  | 37 | 226 | 187 |
| Adults aged 18 years and above reporting previous SARS-CoV-2 test                  | 14-365  | 51.5 (-16.5;<br>79.8)      | 173 | 35  | 20 | 71  | 47  |
| Adults aged 18 years and above                                                     | 366+    | -18.9<br>(-83.2; 22.8)     | 950 | 117 | 57 | 542 | 234 |
| Adults aged 18 years and above (plus adjustment for previous SARS-CoV-2 infection) | 366+    | -19.1<br>(-83.5; 22.7)     | 950 | 117 | 57 | 542 | 234 |
| Adults aged 18 years and above (plus adjustment for previous SARS-CoV-2 test)      | 366+    | -20.0<br>(-86.0; 22.5)     | 950 | 117 | 57 | 542 | 234 |
| Adults aged 18-59 years                                                            | 14-365  | 52.9 (15.2;<br>73.9)       | 461 | 38  | 40 | 178 | 205 |
| Adults aged 60 years and above                                                     | 14-365  | 72.3 (32.0;<br>88.7)       | 200 | 35  | 17 | 119 | 29  |
| Adults aged 18-59 years                                                            | 366+    | -85.7<br>(-225.5;<br>-5.9) | 614 | 59  | 40 | 310 | 205 |
| Adults aged 60 years and above                                                     | 366+    | 39.8 (-31.0;<br>72.3)      | 336 | 58  | 17 | 232 | 29  |

---

\* adjusted for symptom onset week, age, sex, and presence of at least one chronic condition including diabetes, immunodeficiency, lung disease, and heart disease

CVE: COVID-19 vaccine effectiveness

CI: confidence interval

**Supplement Table S3.** Protection conferred by prior infection and/or vaccine effectiveness COVID-19 vaccine effectiveness for at least first booster vaccination among 18+ adults (reference group: no prior infection and no vaccination), VEBIS primary care study, Hungary, September 2022 -March 2023.

| Population                                                                                                      | Time since last booster vaccination (days) | Adjusted CVE (95% CI)*    | N     | Vaccinated cases | Unvaccinated cases | Vaccinated controls | Unvaccinated controls |
|-----------------------------------------------------------------------------------------------------------------|--------------------------------------------|---------------------------|-------|------------------|--------------------|---------------------|-----------------------|
| Adults aged 18 years and above unvaccinated, previously infected (60-365 days) VS. unvaccinated, never infected | 14+                                        | -246.1<br>(-929.3; -16.4) | 244   | 8                | 40                 | 20                  | 176                   |
| Adults aged 18 years and above unvaccinated, previously infected (366+ days) VS. unvaccinated, never infected   | 14+                                        | -210.8<br>(-787; -8.9)    | 263   | 9                | 40                 | 38                  | 176                   |
| Adults aged 18 years and above vaccinated, never infected VS. unvaccinated, never infected                      | 14+                                        | 12.0 (-34.4; 42.4)        | 1,050 | 162              | 40                 | 672                 | 176                   |
| Adults aged 18 years and above vaccinated, previously infected (60-365 days) VS. unvaccinated, never infected   | 14+                                        | 84.8 (50.1; 95.4)         | 310   | 5                | 40                 | 89                  | 176                   |
| Adults aged 18 years and above vaccinated, previously infected (366+ days) VS. unvaccinated, never infected     | 14+                                        | -45.3<br>(-191.6; 27.6)   | 317   | 23               | 40                 | 78                  | 176                   |
| Adults aged 18-59 years unvaccinated, previously infected (60-365 days) VS. unvaccinated, never infected        | 14+                                        | -367<br>(-1395.1; -45.9)  | 203   | 8                | 25                 | 17                  | 153                   |
| Adults aged 18-59 years unvaccinated, previously infected (366+ days) VS. unvaccinated, never infected          | 14+                                        | -212.4<br>(-882.2; 0.6)   | 220   | 7                | 25                 | 35                  | 153                   |
| Adults aged 18-59 years vaccinated, never infected VS. unvaccinated, never infected                             | 14+                                        | -18.6<br>(-99.0; 29.3)    | 620   | 75               | 25                 | 367                 | 153                   |

|                                                                                                                 |     |                       |     |    |    |     |     |
|-----------------------------------------------------------------------------------------------------------------|-----|-----------------------|-----|----|----|-----|-----|
| Adults aged 18-59 years vaccinated, previously infected (60-365 days) VS. unvaccinated, never infected          | 14+ | 63.0 (-28.0; 89.3)    | 244 | 4  | 25 | 62  | 153 |
| Adults aged 18-59 years vaccinated, previously infected (366+ days) VS. unvaccinated, never infected            | 14+ | -108.1 (-382.9; 10.3) | 255 | 18 | 25 | 59  | 153 |
| Adults aged 60 years and above unvaccinated, previously infected (60-365 days) VS. unvaccinated, never infected | 14+ | 49.5 (-1307.0; 98.2)  | 41  | 0  | 15 | 3   | 23  |
| Adults aged 60 years and above unvaccinated, previously infected (366+ days) VS. unvaccinated, never infected   | 14+ | -54.8 (-2388.4; 90.4) | 43  | 2  | 15 | 3   | 23  |
| Adults aged 60 years and above vaccinated, never infected VS. unvaccinated, never infected                      | 14+ | 55.1 (1.2; 79.6)      | 430 | 87 | 15 | 305 | 23  |
| Adults aged 60 years and above vaccinated, previously infected (60-365 days) VS. unvaccinated, never infected   | 14+ | 87.6 (26.4; 97.9)     | 66  | 1  | 15 | 27  | 23  |
| Adults aged 60 years and above vaccinated, previously infected (366+ days) VS. unvaccinated, never infected     | 14+ | 39.0 (-138.4; 84.4)   | 62  | 5  | 15 | 19  | 23  |

\* adjusted for symptom onset week, age, sex, and presence of at least one chronic condition including diabetes, immunodeficiency, lung disease, and heart disease

CVE: COVID-19 vaccine effectiveness (When comparing unvaccinated patients, the measure of effect is the protection conferred by infection rather than vaccine effectiveness.)

CI: confidence interval



**Supplement Table S4.** Baseline characteristics of those had previous SARS-CoV-2 test and those without previous SARS-CoV-2 test, VEBIS primary care study, Hungary, September 2022 -March 2023.

| Characteristics                 | Previous SARS-CoV-2 test VS. No previous SARS-CoV-2 test |       |                                            |       |       | p-value |
|---------------------------------|----------------------------------------------------------|-------|--------------------------------------------|-------|-------|---------|
|                                 | Previous SARS-CoV-2 test<br>(n = 432)                    |       | No previous SARS-CoV-2 test<br>(n = 1,531) |       |       |         |
|                                 | n                                                        | %     | n                                          | %     |       |         |
| Age (median [IQR])              | 49 [35–64.5]                                             |       | 48 [34–63]                                 |       | 0.155 |         |
| Missing                         | 0                                                        | 0.00  | 0                                          | 0.00  |       |         |
| Age group (years)               |                                                          |       |                                            |       |       |         |
| 18-59                           | 288                                                      | 66.67 | 1064                                       | 69.50 |       |         |
| 60+                             | 144                                                      | 33.33 | 467                                        | 30.50 | 0.262 |         |
| Sex                             |                                                          |       |                                            |       |       |         |
| Female                          | 268                                                      | 62.04 | 904                                        | 59.05 |       |         |
| Male                            | 164                                                      | 37.96 | 627                                        | 40.95 | 0.263 |         |
| Missing                         | 0                                                        | 0.00  | 0                                          | 0.00  |       |         |
| BMI <sup>a</sup>                |                                                          |       |                                            |       |       |         |
| max. 29                         | 300                                                      | 69.44 | 1,060                                      | 69.24 |       |         |
| 30+                             | 132                                                      | 30.56 | 471                                        | 30.76 | 0.934 |         |
| Missing                         | 0                                                        | 0.00  | 0                                          | 0.00  |       |         |
| Chronic condition <sup>ba</sup> |                                                          |       |                                            |       |       |         |
| Presence of chronic condition   | 128                                                      | 29.63 | 328                                        | 21.42 | 0.000 |         |
| No chronic condition            | 301                                                      | 69.68 | 1,185                                      | 77.40 |       |         |
| Missing                         | 3                                                        | 0.69  | 18                                         | 1.18  |       |         |
| Chronic condition <sup>bb</sup> |                                                          |       |                                            |       |       |         |
| Presence of chronic condition   | 201                                                      | 46.53 | 591                                        | 38.60 | 0.003 |         |
| No chronic condition            | 231                                                      | 53.47 | 936                                        | 61.14 |       |         |
| Missing                         | 0                                                        | 0.00  | 4                                          | 0.26  |       |         |
| Severity <sup>c</sup>           |                                                          |       |                                            |       |       |         |
| 0                               | 399                                                      | 92.36 | 1,419                                      | 92.68 |       |         |
| 1+                              | 33                                                       | 7.64  | 112                                        | 7.32  | 0.820 |         |
| GP consultation <sup>d</sup>    |                                                          |       |                                            |       |       |         |
| 0-1                             | 48                                                       | 11.11 | 235                                        | 15.35 | 0.027 |         |
| 2+                              | 384                                                      | 88.89 | 1,296                                      | 84.65 |       |         |
| Missing                         | 0                                                        | 0.00  | 0                                          | 0.00  |       |         |
| 0-4                             | 178                                                      | 41.20 | 759                                        | 49.58 | 0.002 |         |
| 5+                              | 254                                                      | 58.80 | 772                                        | 50.42 |       |         |
| Missing                         | 0                                                        | 0.00  | 0                                          | 0.00  |       |         |

|                                                       |     |       |       |       |       |  |
|-------------------------------------------------------|-----|-------|-------|-------|-------|--|
| Smoking <sup>e</sup>                                  |     |       |       |       |       |  |
| Never or former                                       | 313 | 72.45 | 1,126 | 73.55 |       |  |
| Current                                               | 82  | 18.98 | 340   | 22.21 | 0.305 |  |
| Missing                                               | 37  | 8.56  | 65    | 4.25  |       |  |
| Swab delay <sup>f</sup>                               |     |       |       |       |       |  |
| max. 2 days                                           | 243 | 56.25 | 873   | 57.02 | 0.775 |  |
| 3+ days                                               | 189 | 43.75 | 658   | 42.98 |       |  |
| Missing                                               | 0   | 0.00  | 0     | 0.00  |       |  |
| Case status                                           |     |       |       |       |       |  |
| SARS-CoV-2 case                                       | 132 | 30.56 | 223   | 14.57 | 0.000 |  |
| Test-negative control                                 | 300 | 69.44 | 1,308 | 85.43 |       |  |
| Missing                                               | 0   | 0.00  | 0     | 0.00  |       |  |
| Self-reported prior SARS-CoV-2 infection <sup>g</sup> |     |       |       |       |       |  |
| Prior                                                 | 134 | 31.02 | 296   | 19.33 | 0.000 |  |
| No prior                                              | 298 | 68.98 | 1,235 | 80.67 |       |  |
| Missing                                               | 0   | 0.00  | 0     | 0.00  |       |  |
| Self-reported prior SARS-CoV-2 infection <sup>g</sup> |     |       |       |       |       |  |
| Prior (60-365 days)                                   | 70  | 19.02 | 126   | 9.26  | 0.000 |  |
| No prior                                              | 298 | 80.98 | 1,235 | 90.74 |       |  |
| Self-reported prior SARS-CoV-2 infection <sup>g</sup> |     |       |       |       |       |  |
| Prior (366+ days)                                     | 64  | 17.68 | 170   | 12.10 | 0.005 |  |
| No prior                                              | 298 | 82.32 | 1,235 | 87.90 |       |  |
| COVID-19 vaccination status                           |     |       |       |       |       |  |
| Unvaccinated                                          |     |       |       |       |       |  |
| All                                                   | 67  | 15.51 | 224   | 14.63 |       |  |
| 18-59 years (age)                                     | 56  | 19.44 | 189   | 17.76 |       |  |
| 60+ years (age)                                       | 11  | 7.64  | 35    | 7.49  |       |  |
| Full primary series plus at least one booster dose    |     |       |       |       |       |  |
| All                                                   | 246 | 56.94 | 783   | 51.14 | 0.755 |  |
| 18-59 years (age)                                     | 137 | 47.57 | 448   | 42.11 | 0.861 |  |
| 60+ years (age)                                       | 109 | 75.69 | 335   | 71.73 | 0.924 |  |
| 14-180 days (time since last vaccination)             | 18  | 4.17  | 34    | 2.22  | 0.075 |  |
| 181-365 days (time since last vaccination)            | 88  | 20.37 | 230   | 15.02 | 0.188 |  |
| 366+ days (time since last vaccination)               | 140 | 32.41 | 519   | 33.90 | 0.540 |  |
| Homologous series <sup>h</sup>                        | 130 | 30.09 | 366   | 23.91 | 0.319 |  |
| Heterologous series <sup>h</sup>                      | 116 | 26.85 | 417   | 27.24 | 0.677 |  |

<sup>a</sup> BMI calculated as weight/(height\*height).

<sup>a</sup> BMI calculated as weight/(height\*height).

---

<sup>ba</sup> The presence of chronic condition is defined as reporting at least one of the following conditions: diabetes, heart disease, lung disease, immunodeficiency.

---

<sup>bb</sup> The presence of chronic condition is defined as reporting at least one of the following conditions: diabetes, heart disease, hypertension, lung disease, immunodeficiency, cancer, renal disease.

---

<sup>c</sup> Severity: number of hospitalizations in the previous 12 months for chronic disease.

---

<sup>d</sup> Number of GP consultations in the previous 12 months.

---

<sup>e</sup> Former: stopped smoking at least 1 year before inclusion in the study. Current smoker: any smoking can be included: cigarettes, cigars, vaping, etc.

---

<sup>f</sup> Swab delay: number of days between date of swab and date of onset.

---

<sup>g</sup> Previous SARS-CoV-2 infection: Has the patient had a positive SARS-CoV-2 test prior to this illness episode? (At all, 60-365, 366+ days before current onset)

---

<sup>h</sup> Homologous series: primary series and at least one dose booster dose are all mRNA vaccines. Heterologous series: primary series and at least one dose booster are not all mRNA vaccines.

---
